# Supplementary material for: Alpha-synuclein pathological deposition alters functional homeostasis and connectivity of striatal dopaminergic synapses and results in microglia activation, pathology spreading, muscle stiffness, whole brain atrophy and metabolic changes before producing frank nigral neuron deafferentation
Source: Research Square preprint supplement (doi:10.21203/rs.3.rs-6502918/v1), 2025-05-08
Supplement: Supplementary file 1 [file 199ee5e1a6ba1dd92d1107ff.pdf]

Supplementary Figure 1

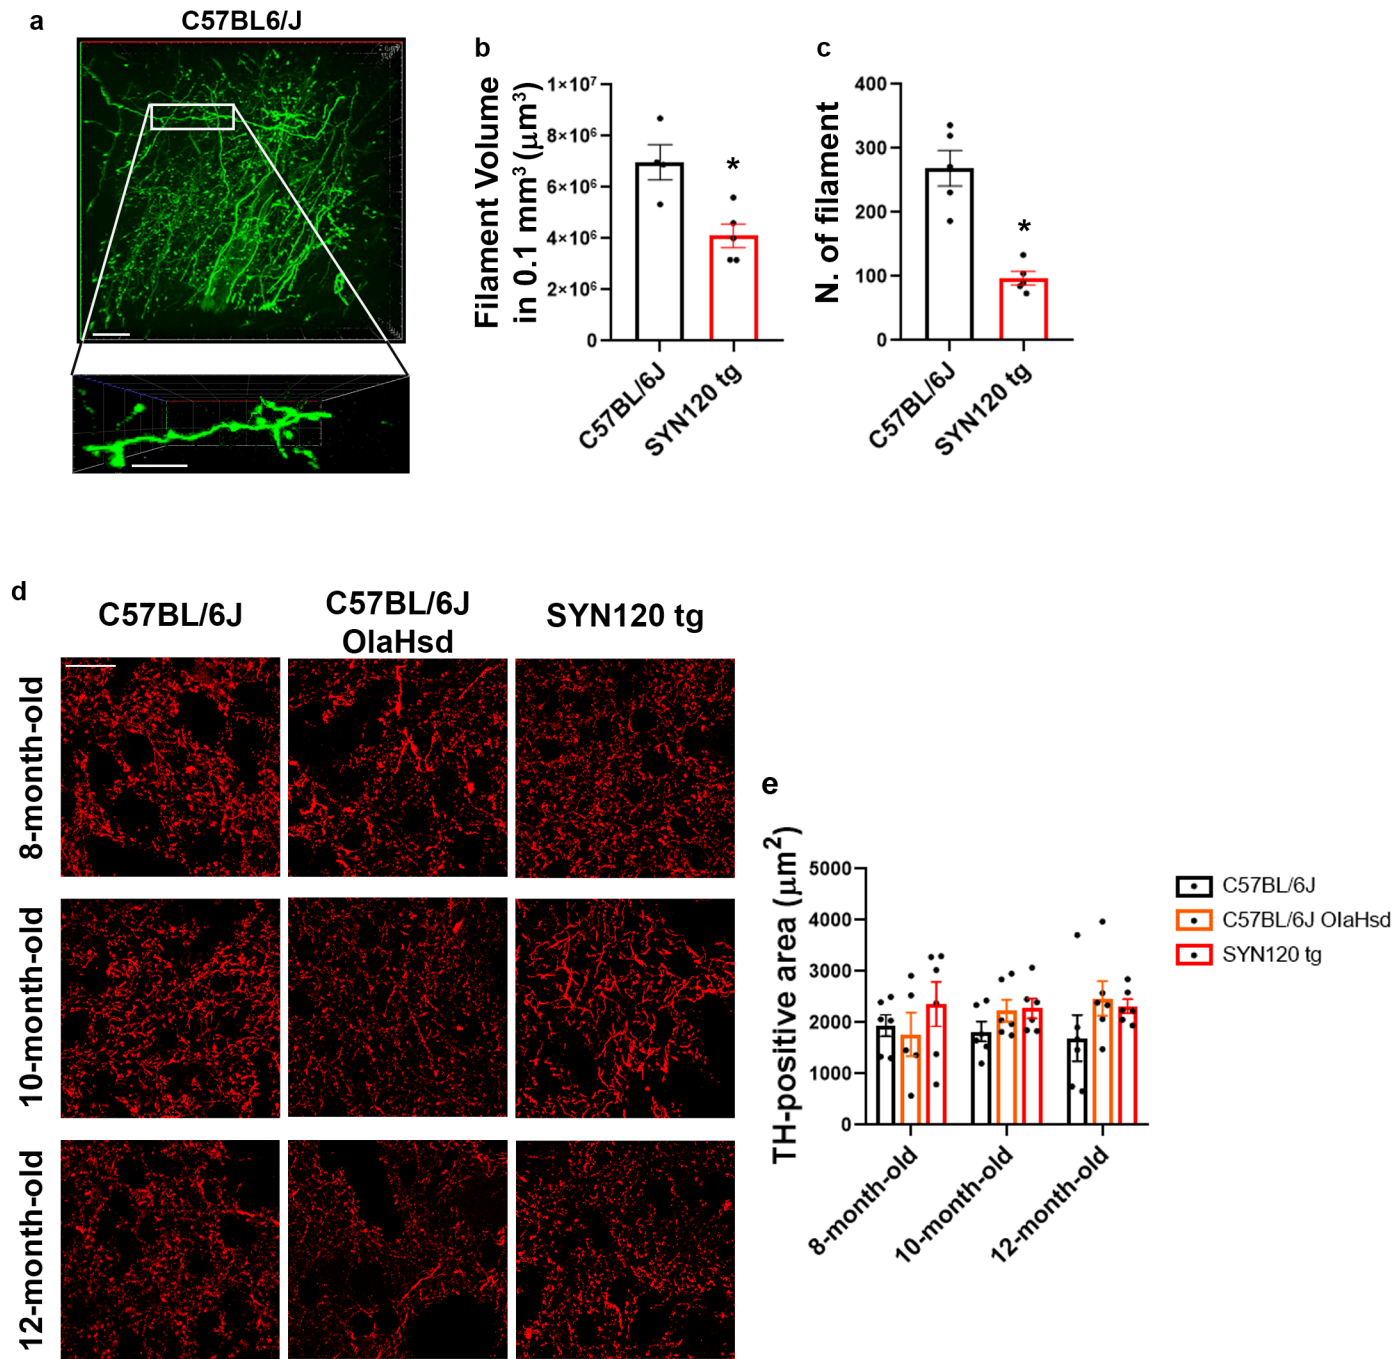

Supplementary Figure 2

**a**

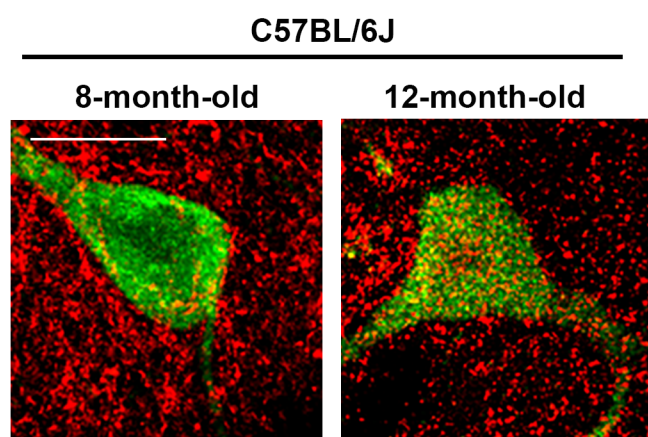

**b**

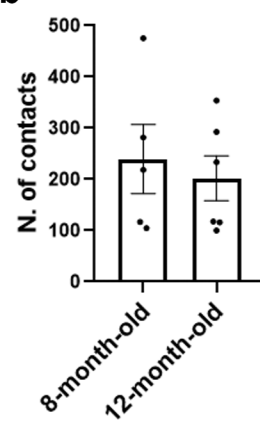

**c**

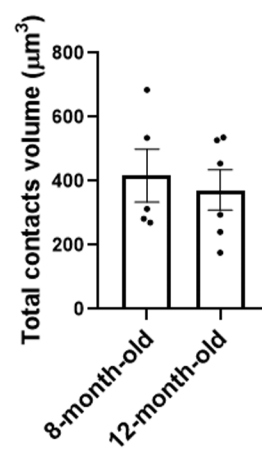

Supplementary Figure 3

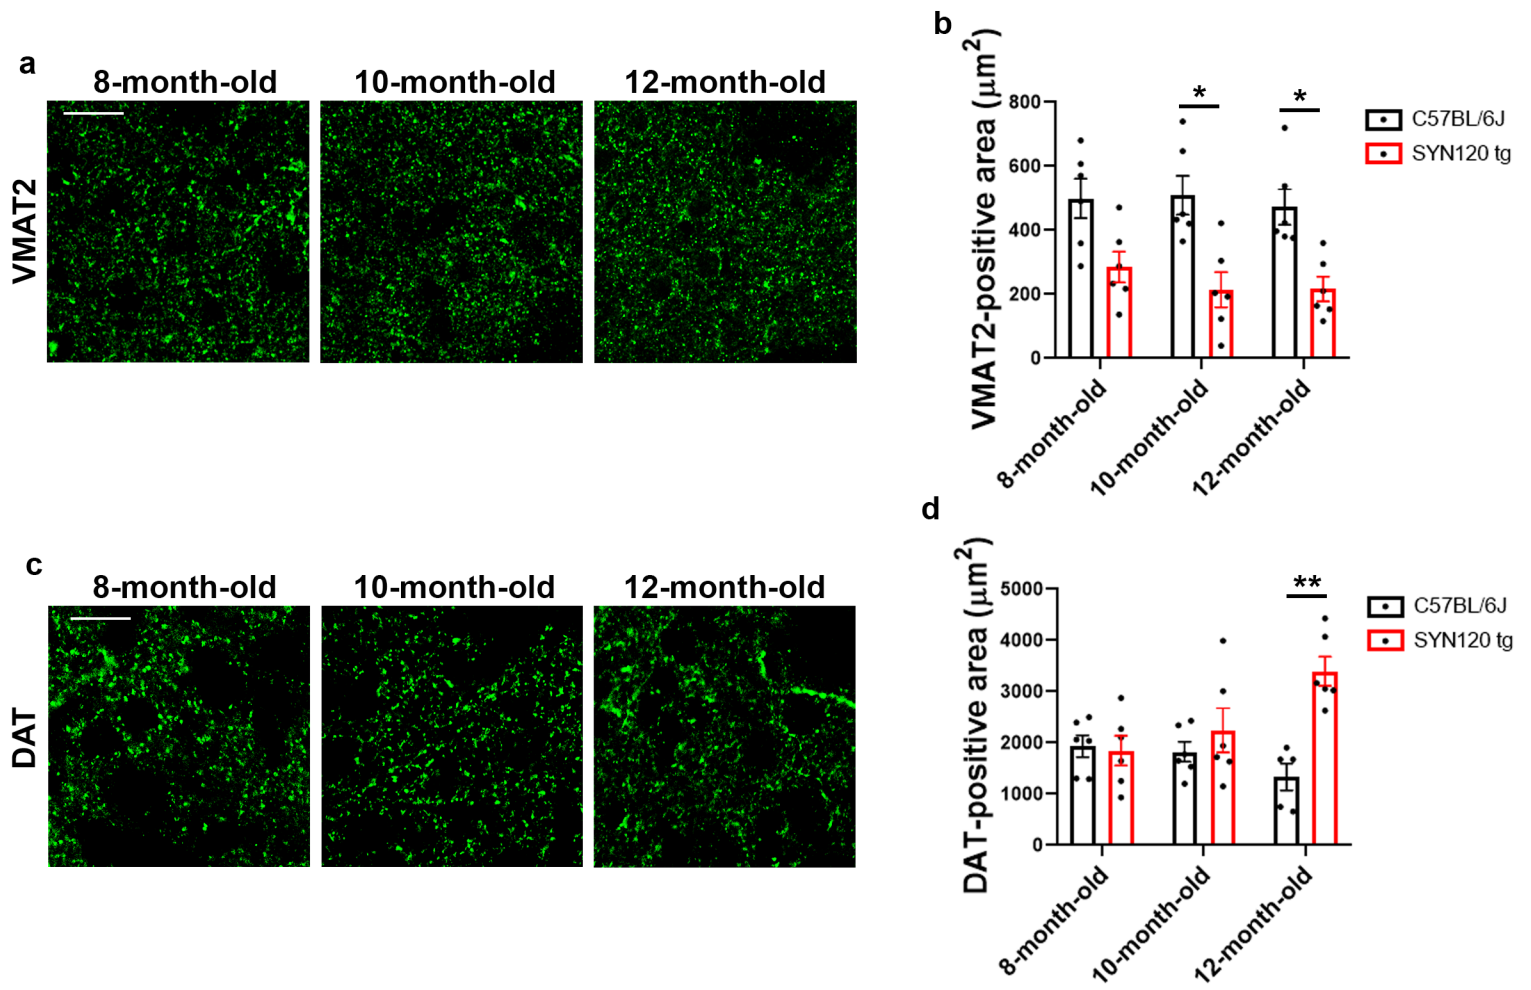

**Supplementary Figure 4**

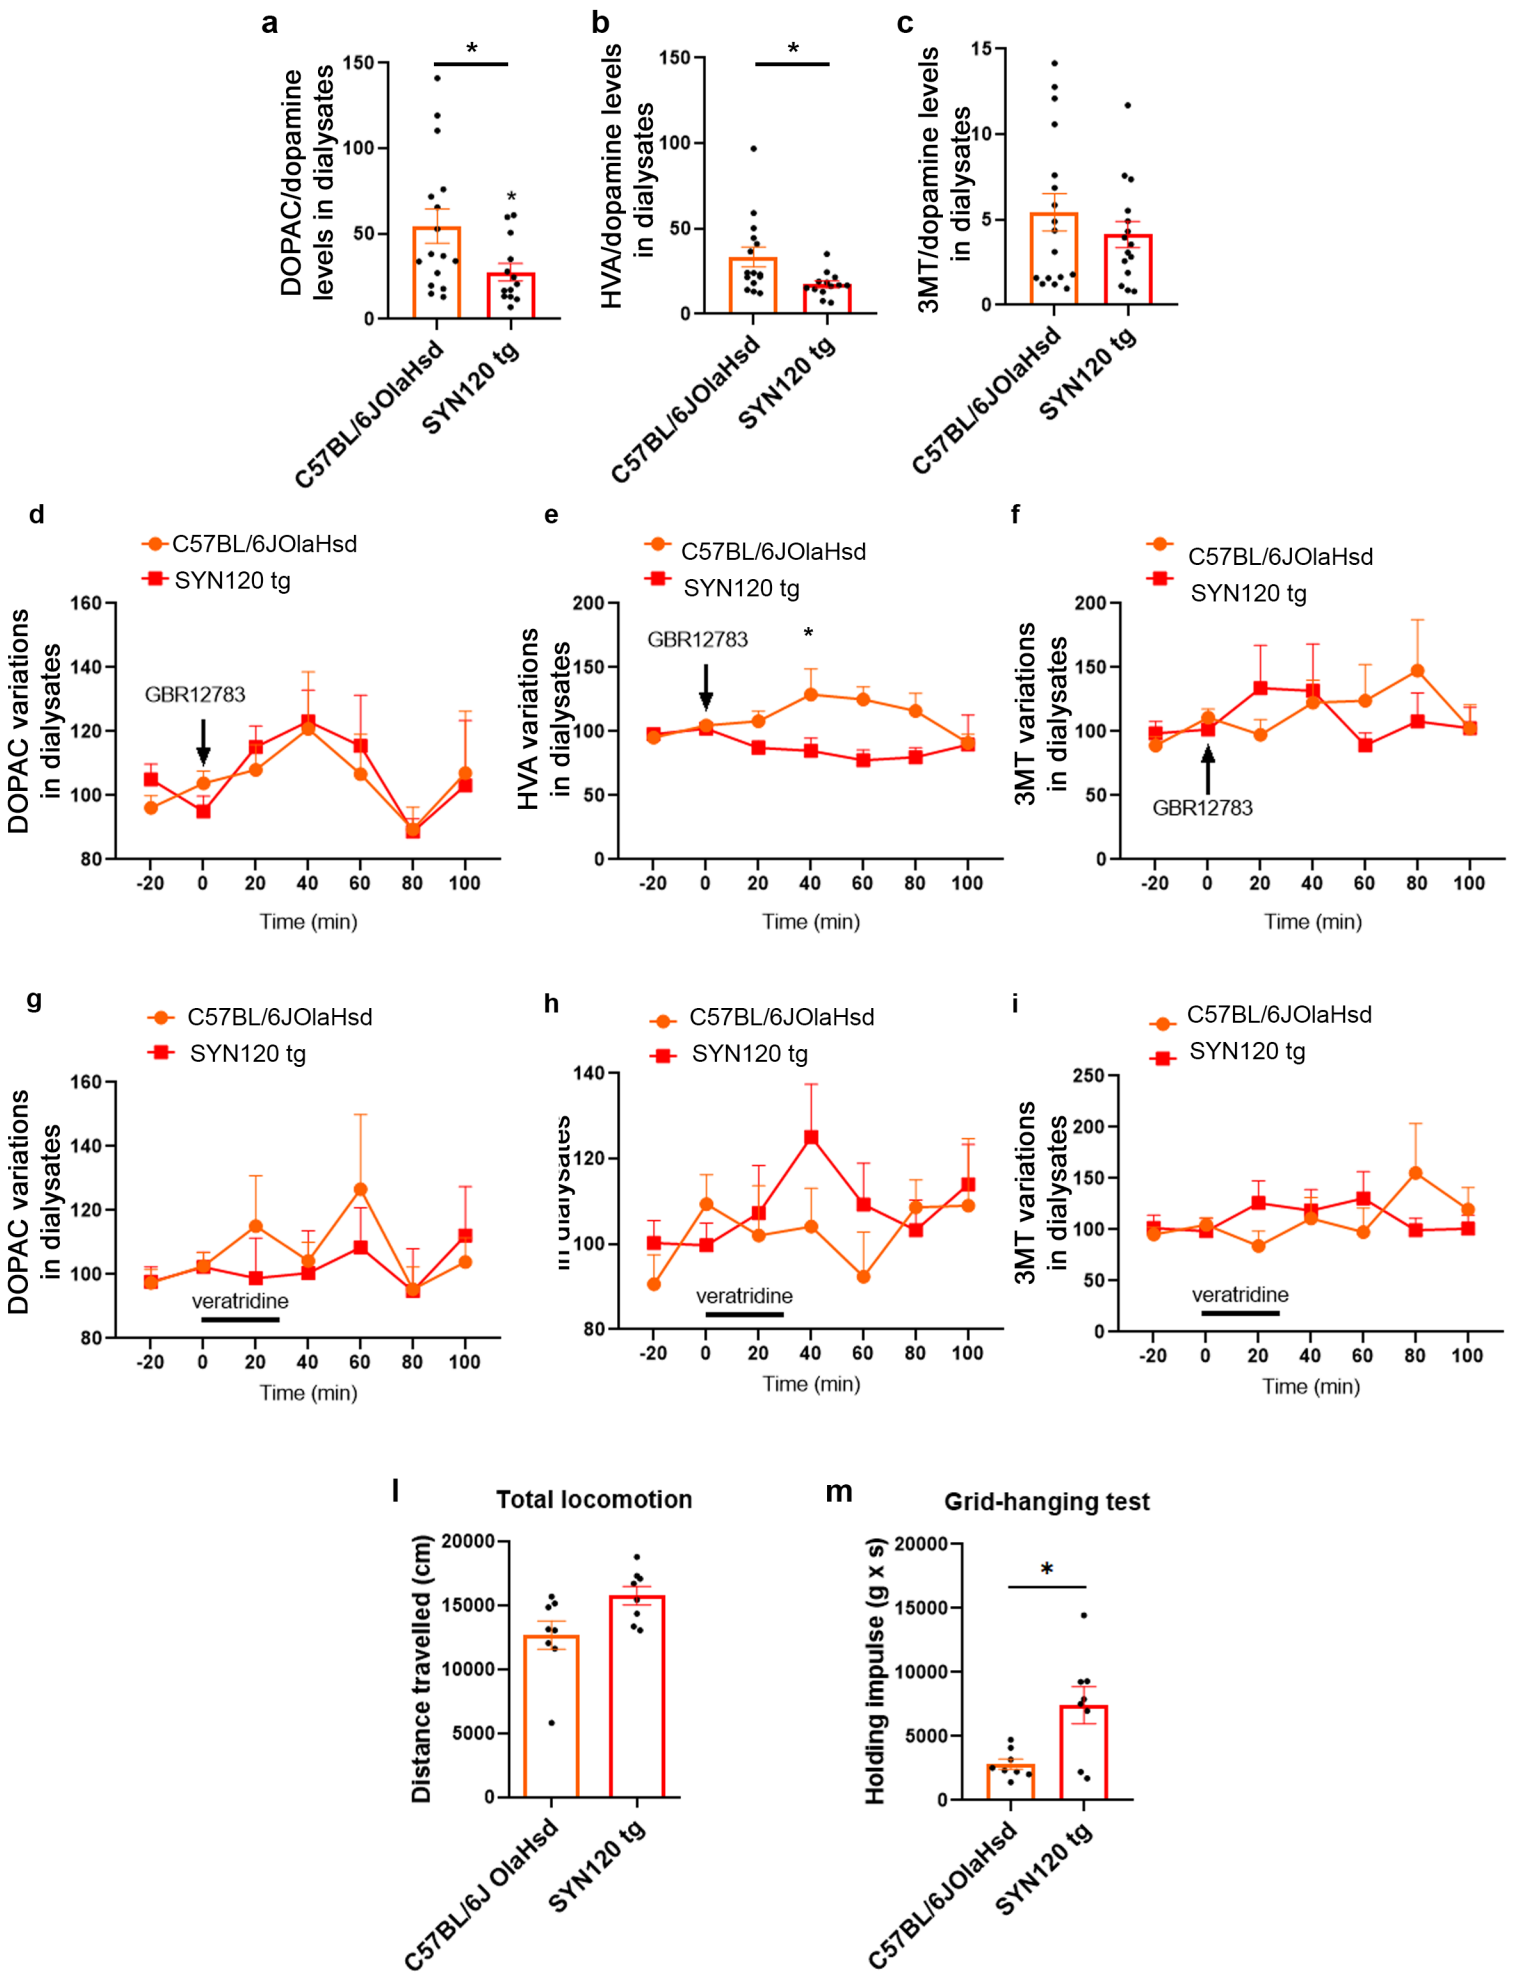

Supplementary Figure 5

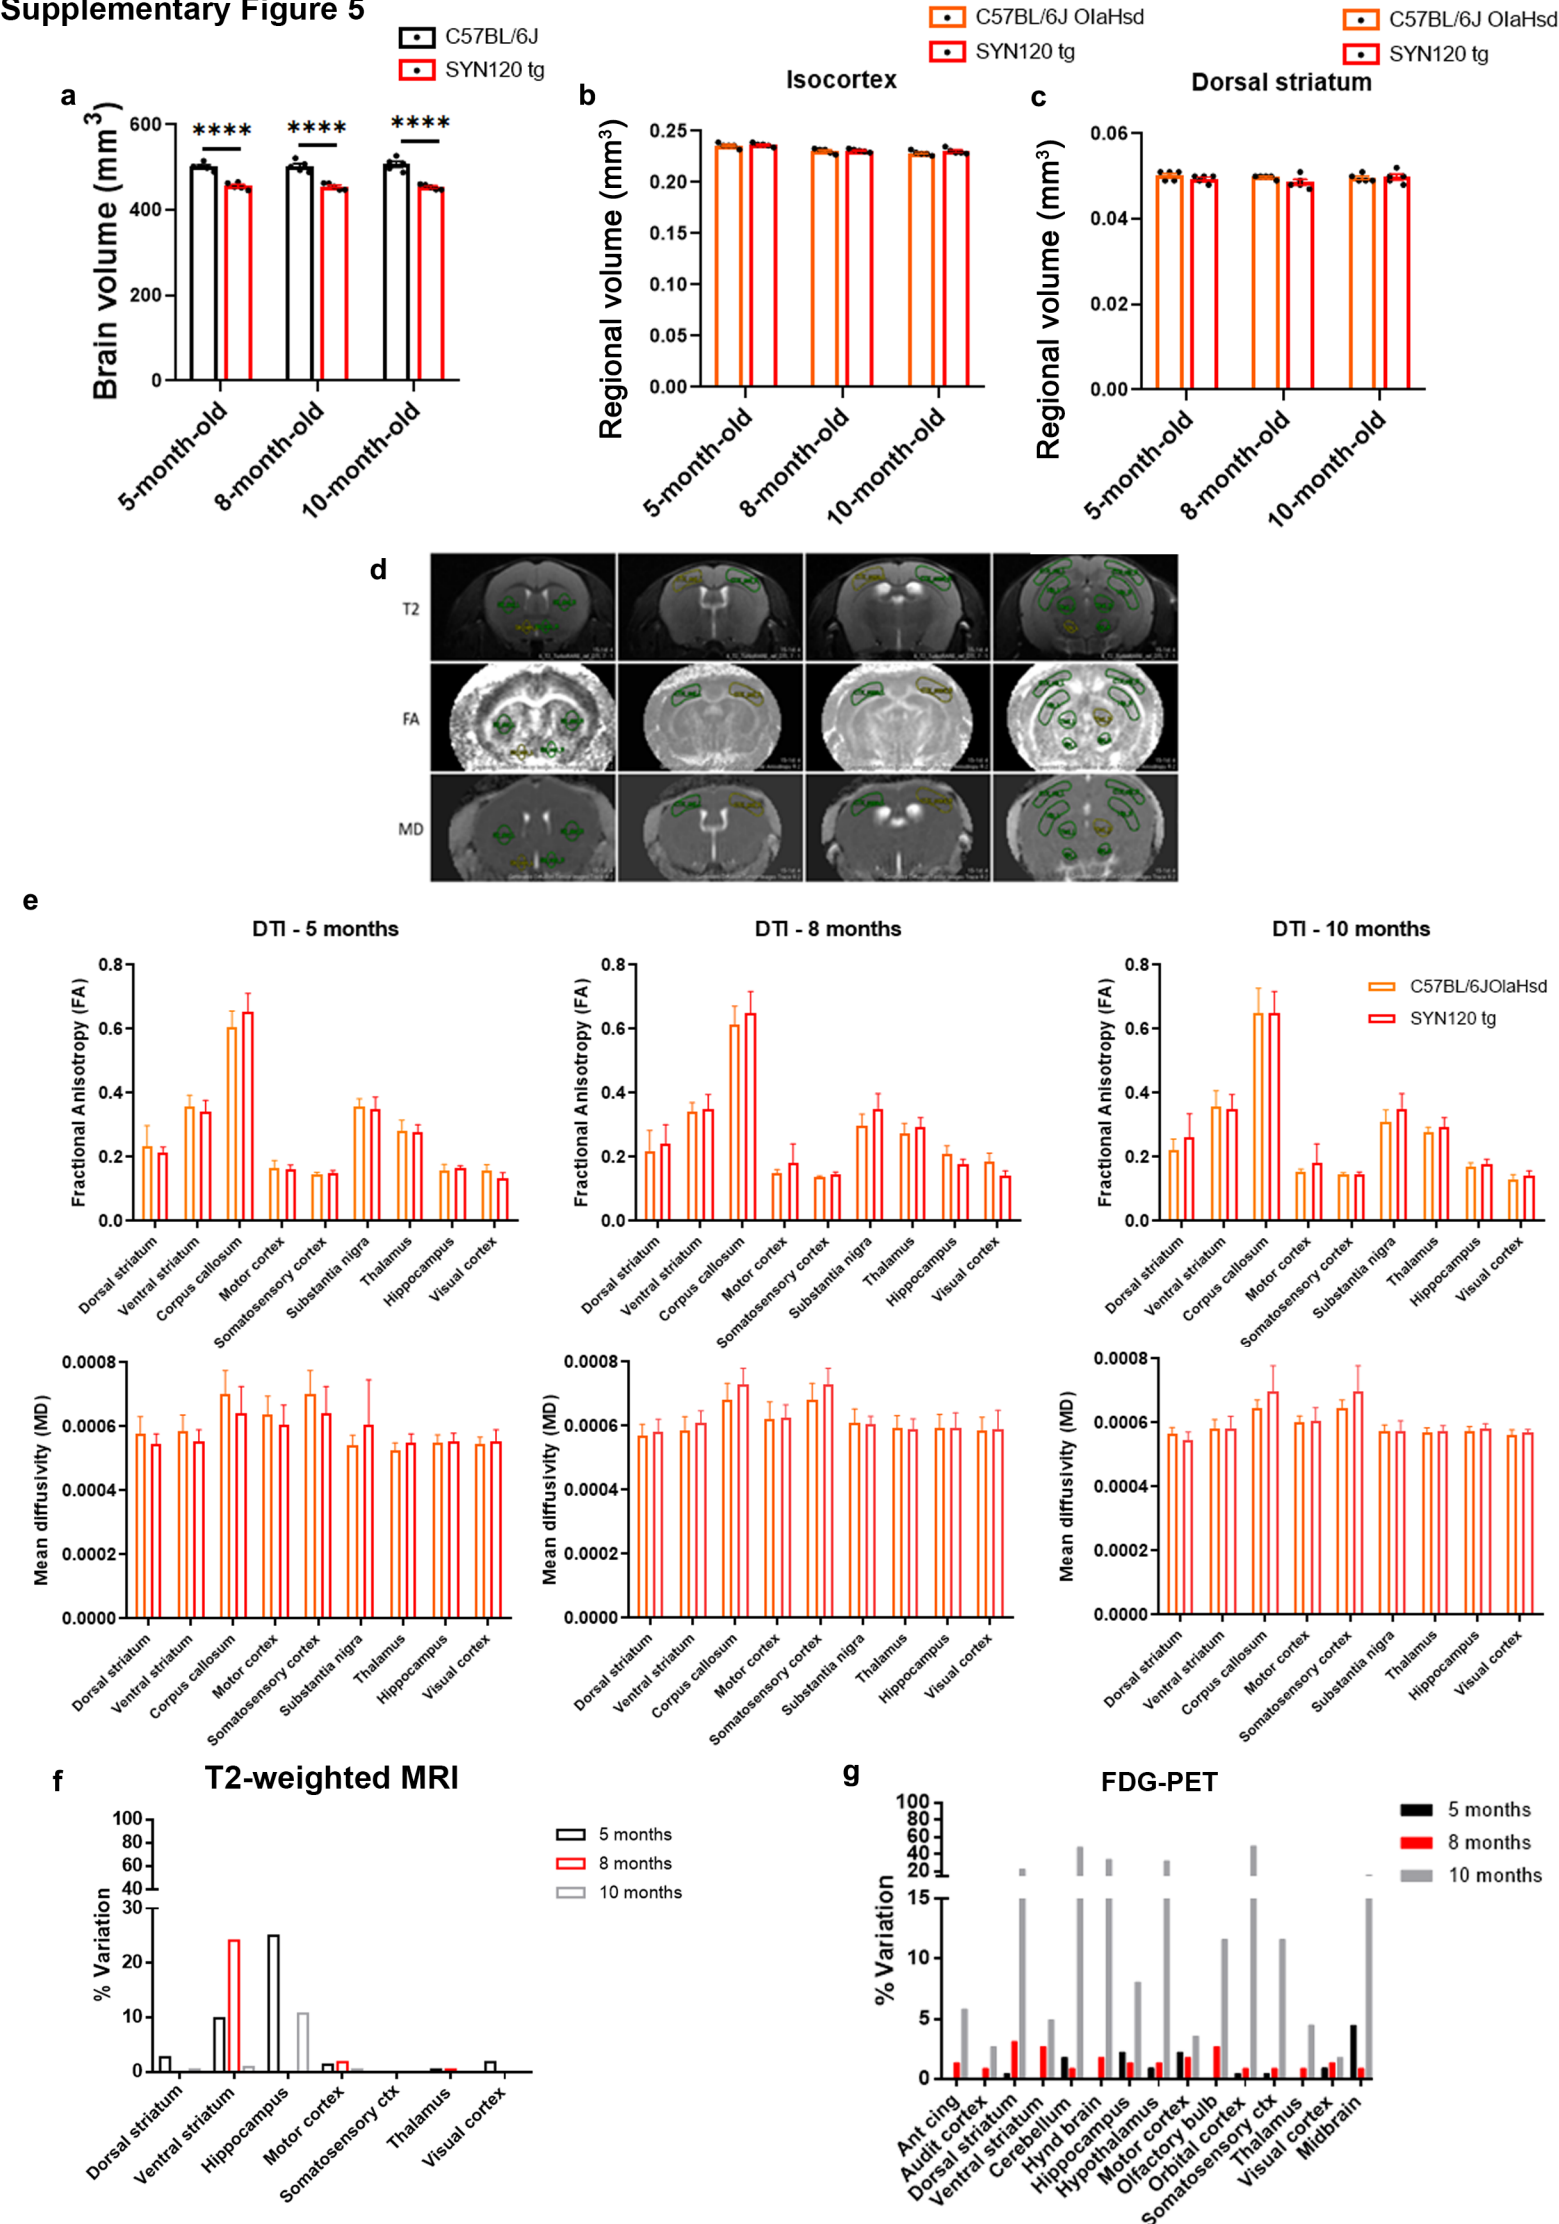

Supplementary Figure 6

a

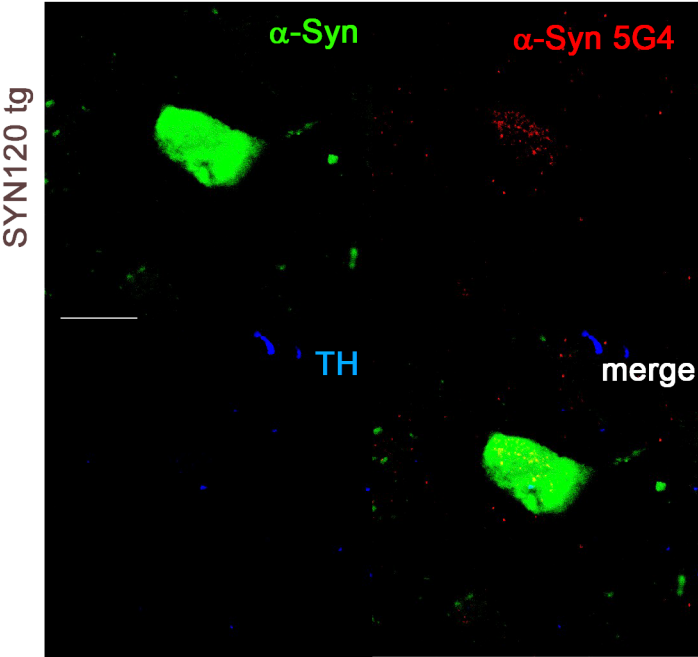

b

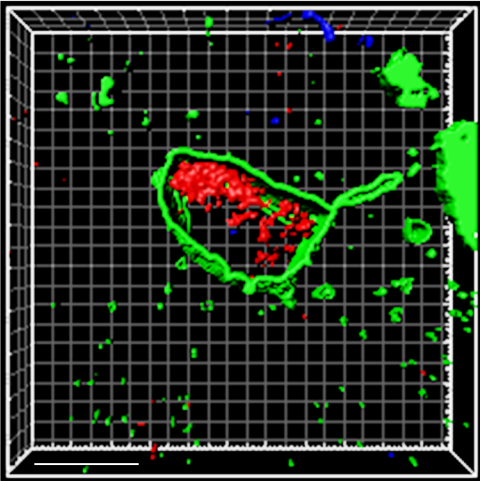

c

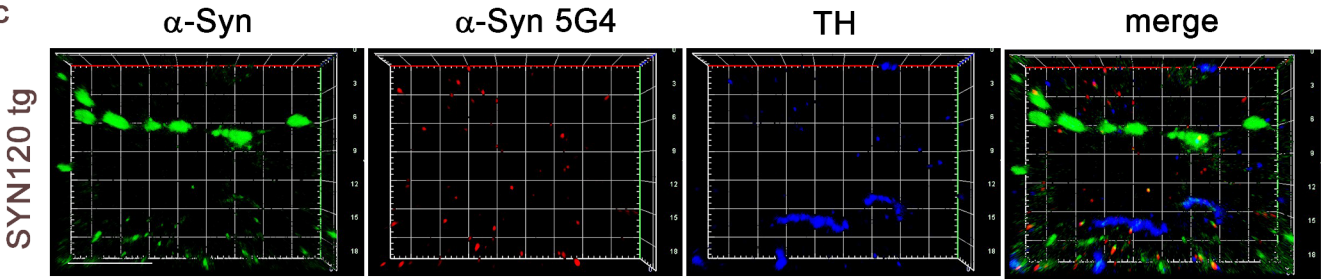

d

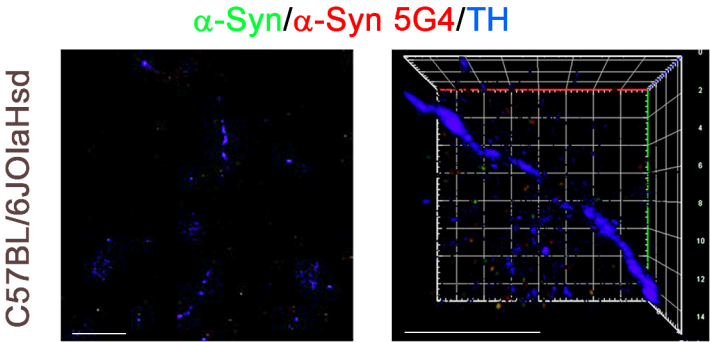



**Supplementary Fig. 1 Striatal GFP-positive fibres two-photon-based 3D reconstruction in 12 month-old C57BL/6J mice.** a. Representative 3D reconstruction of z-stack imaging of GFP-positive fibres in the striatum of C57BL/6J mice. Scale bar = 50  $\mu\text{m}$ , higher magnification panel = 20  $\mu\text{m}$ . b. Graph is showing a significant decrease in the total volume of GFP-positive fibres in the dorsal striatum of SYN120 tg mice when compared to C57BL/6J animals. \*  $p < 0.05$ , non-parametric Mann-Whitney two-tailed test.  $N = 5$  mice each group. c. Graph is showing a significant reduction in the number of GFP-positive striatal fibres in SYN120 tg mice when compared to C57BL/6J animals. \*  $p < 0.05$ , non-parametric Mann-Whitney two-tailed test.  $N = 5$  mice each group. d. Representative images showing TH-immunolabelling in the striatum of C57BL/6J, C57BL/6JolaHsd and SYN120 tg mice at 8, 10 and 12 months of age. Scale bar = 20  $\mu\text{m}$ . e. Graph is showing the analysis of TH-positive area in the striatum of C57BL/6J, C57BL/6JolaHsd and SYN120 tg mice at 8, 10 and 12 months of age. No differences were detected between the total area of TH-positive fibres of the three mouse lines analysed. Two-way ANOVA + Bonferroni multiple comparisons test.  $N = 6$  mice each group.

**Supplementary Fig. 2 Analysis of striatal contacts between ChAT-positive neurons and TH-positive fibres in C57BL/6J control mice.** a. Representative images showing ChAT (green) and TH (red) immunolabelling in C57BL/6J at 8 and 12 months of age. Scale bar = 10  $\mu\text{m}$ . b. Graph is showing the number of contacts between ChAT-positive neurons and TH-positive fibres in C57BL/6J animals at 8 and 12 months of age. No differences were detected between 8-month-old and 12-month-old animals. Mann-Whitney two-tailed test.  $N = 5/6$  mice each group. c. Graph is showing the analysis of the ChAT/TH contact volume in 8- and 12-month-old control mice. No differences were detected neither at 8 or 12 months of age. Mann-Whitney two-tailed test.  $N = 5/6$  mice each group.

**Supplementary Fig. 3 Striatal VMAT2 and DAT immunofluorescence in 8-, 10- and 12-month-old C57BL/6J mice.** a. Representative images showing VMAT2 immunostaining in the striatum of C57BL/6J mice. Scale bar = 20  $\mu\text{m}$ . b. Graph is showing the analysis of VMAT2-positive area, expressed in  $\mu\text{m}^2$ , in the striatum of C57BL/6J and SYN120 tg mice at 8, 10 and 12 months of age. Please note the statistically significant decrease of VMAT2-positive area in the striatum of SYN120 tg mice at 8, 10 and 12 months of age when compared to C57BL/6J littermates. \*  $p < 0.05$ . Two-way ANOVA + Bonferroni multiple comparisons test.  $N = 6$  mice each group. c. Representative images showing DAT immunolabelling in C57BL/6J mice. Scale bar = 20  $\mu\text{m}$ . d. Graph is showing the analysis of DAT-immunopositive area, expressed in  $\mu\text{m}^2$ , in the striatum of C57BL/6J and SYN120 tg mice at 8, 10 and 12 months of age. Please note the statistically significant increase of DAT-

positive area in the striatum of SYN120 tg mice at 12 months of age when compared to C57BL/6J littermates. \*\*  $p < 0.01$ . Two-way ANOVA + Bonferroni multiple comparisons test. N = 6 mice each group.

**Supplementary Fig. 4 Analysis of striatal dopamine turnover.** a. Graph is showing that ratio between the extracellular levels of DOPAC and dopamine were significantly reduced in SYN120 tg mice when compared to C57BL/6JOLA<sup>Hsd</sup> animals. N = 15/17 measurements. \*  $p < 0.05$ , non-parametric Mann-Whitney two-tailed test. b. Graph showing that the ratio between the extracellular levels of HVA and dopamine were significantly decreased in SYN120 tg mice when compared to C57BL/6J animals. N = 15/17 measurements. \*  $p < 0.05$ , non-parametric Mann-Whitney two-tailed test. c. Graph is showing the ratio between the extracellular levels of 3MT and dopamine. No differences were detected between SYN120 tg and C57BL/6JOLA<sup>Hsd</sup> mice. N = 15/17 measurements. Non-parametric Mann-Whitney two-tailed test. d-f. Acute effect of systemic GBR12783 (20 mg/kg; i.p.) administration on extracellular dopamine metabolites DOPAC (e), HVA (e) and 3MT (f) in SYN120 tg and C57BL/6JOLA<sup>Hsd</sup> mice. Dialysate levels of dopamine metabolites, expressed as percentages of baseline, show differences in C57BL/6JOLA<sup>Hsd</sup> mice only for HVA 40 and 60 minutes after GBR12783 administration vs basal values (both -20 and 0 time-points). \*  $p < 0.05$ . One-way ANOVA + Bonferroni multiple comparisons test. N = 8/9 mice each group. g-i. Reverse dialysis of veratridine (10  $\mu$ M; for 30 minutes) in the striatum on the striatal extracellular levels of dopamine metabolites DOPAC (g), HVA (h) and 3MT (i) of SYN120 tg and C57BL/6JOLA<sup>Hsd</sup> mice. Dialysate levels of dopamine metabolites, expressed as percentages of baseline, did not show changes after veratridine administration. One-way ANOVA + Bonferroni multiple comparisons test. N = 7/8 mice each group. l. Analysis of the distance travelled of SYN120 tg and C57BL/6JOLA<sup>Hsd</sup> animals in the Open field test at 10 months of age did not evidence differences between SYN120 tg and C57BL/6JOLA<sup>Hsd</sup> mice. Non-parametric Mann-Whitney two-tailed test. N = 8/9 mice each group. m. Ten-month-old SYN120 tg animals exhibited increased holding impulse in grid hanging test vs C57BL/6JOLA<sup>Hsd</sup> littermates. \*  $p < 0.05$ , non-parametric Mann-Whitney two-tailed test. N = 8/9 mice each group.

**Supplementary Fig. 5 MRI-based brain volume, FA, MD analysis and radiomic studies of T2-weighted MRI and [<sup>18</sup>F]-FDG PET-CT.** a. Total brain volume measured on T2-weighted images in 5-, 8- and 10-month-old SYN120 tg and C57BL/6J animals. \*\*\*\*  $p < 0.0001$ , two-way ANOVA + Bonferroni multiple comparisons test. b, c. Regional brain volume measured on T2-weighted images in 5-, 8- and 10-month-old SYN120 tg and C57BL/6JOLA<sup>Hsd</sup> animals did not show differences in the



isocortex (b) and dorsal striatum (c) between strains. Two-way ANOVA + Bonferroni multiple comparisons test. N = 5 mice. d. Image showing the representative regions of interest (ROIs) considered for the segmentation of region identification for FA and MD. e. DTI-MRI analysis of FA and MD of SYN120 tg and C57BL/6JolaHsd animals at 5, 8 and 10 months of age. f. Radiomic analysis of T2-weighted MRI in which data are expressed as % of Variation of SYN120 tg and C57BL/6JolaHsd animals at 5, 8 and 10 months of age. g. Radiomic analysis of striatal uptake of [ $^{18}\text{F}$ ]-FDG PET-CT images showing the % of Variation of SYN120 tg mice vs C57BL/6JolaHsd littermates at 5, 8 and 10 months of age.

**Supplementary Fig. 6 Diffusion and accumulation of  $\alpha$ -Syn aggregates in the motor cortex of 8-month-old SYN120 tg mice.** a. Representative images showing  $\alpha$ -Syn-positive cells containing 5G4-labelled  $\alpha$ -Syn aggregates in proximity to TH-positive filaments (in blue) in the motor cortex of 8 month-old SYN120 tg mice. Scale bar = 10  $\mu\text{m}$ . b. Surface reconstruction of 3D z-stack images in panel a. Scale bar = 8  $\mu\text{m}$ . c. Representative images showing an  $\alpha$ -Syn-positive filament positive for 5G4-immunopositive aggregated  $\alpha$ -Syn in proximity to TH-positive terminal in the motor cortex of 8 month-old SYN120 mice. Scale bar = 10  $\mu\text{m}$ . d. Representative images showing the absence of  $\alpha$ -Syn and 5G4-labelled  $\alpha$ -Syn aggregates in proximity to TH-positive filaments in the motor cortex of C57BL/6JolaHsd at 8 months of age.

**Supplementary video 1** 3D rendering of two-photon-based imaging of GFP-positive striatal fibres from C57BL/6JolaHsd thick clarified sections.

**Supplementary video 2** 3D rendering of two-photon-based imaging of GFP-positive striatal fibres from SYN120 tg mice.

**Supplementary video 3** 3D rendering of two-photon-based imaging of GFP-positive striatal fibres from C57BL/6J mice.
